# Supplementary material for: Synthesis and Crystal and Electronic Structures of the Zintl Phase Sr21Cd4Sb18
Source: MDPI journal article supplement (doi:10.3390/solids4040022), 2023-11-17
Supplement: s1 [file s1]

# Supplementary information

## **Synthesis, crystal and electronic structure of the Zintl phase $\text{Sr}_{21}\text{Cd}_4\text{Sb}_{18}$**

Kowsik Ghosh <sup>1</sup>, Svilen Bobev <sup>1,\*</sup>

<sup>1</sup>Department of Chemistry and Biochemistry, University of Delaware, Newark, DE 19716, <sup>USA</sup>

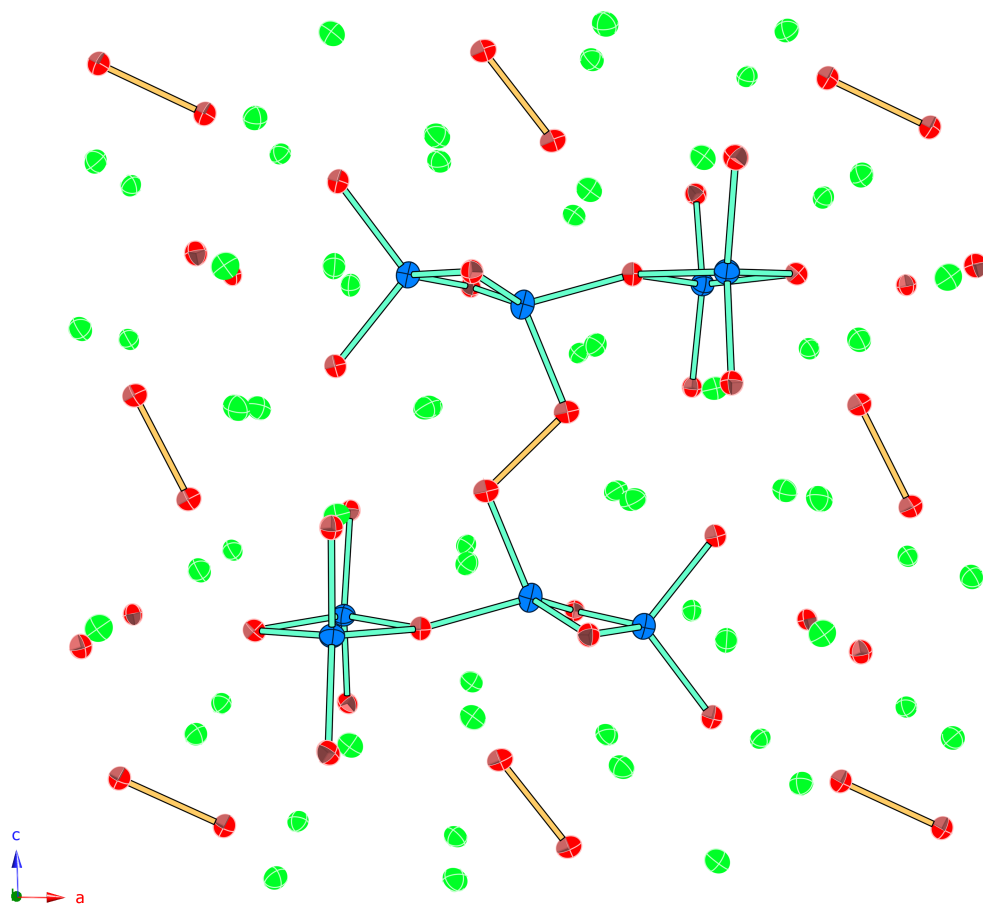

**Figure S1.** Crystal structure of  $\text{Sr}_{21}\text{Cd}_4\text{Sb}_{18}$  shown with anisotropic displacement parameters that are drawn at the 95% probability level. Sr atoms are shown in green, Sb in red and Cd in blue.
